# Supplementary material for: Sustained Increase of 25-Hydroxyvitamin D Levels in Healthy Young Women during Wintertime after Three Suberythemal UV Irradiations—The MUVY Pilot Study
Source: PubMed Central journal article supplement (PMC4951026; doi:10.1371/journal.pone.0159040), 2016-07-19
Supplement: pone.0159040.s005.pdf [file pone.0159040.s005.pdf]

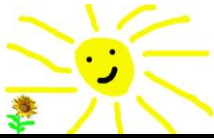

**Demographischer Teil**

01. Datum: |\_|\_|\_|.|\_|\_|.201|\_|

02. Alter: |\_|\_|\_|      03. Geschlecht:  weiblich     männlich

04. Größe: |\_|\_|\_|\_| cm      05. Gewicht: |\_|\_|\_|,|\_|\_| kg

**Menstruation:**

06. Datum des 1. Tages der letzten Regelblutung: |\_|\_|\_|.|\_|\_|.|\_|\_|\_|

07. Einnahmen hormoneller Kontrazeptiva?     nein                     ja

08. Wenn ja, welche? \_\_\_\_\_

Wenn nein:    09. Zyklusdauer:  regelmäßig     unregelmäßig

10. Länge eines Zyklus: ca. |\_|\_|\_| Tage

**Medikamente:**

11. Regelmäßige Medikamenteneinnahmen?     nein                     ja, welche

| 12. Medikament | Tagesdosis | seit wann?        | weshalb? |
|----------------|------------|-------------------|----------|
| _____          | _____      | _ _ . _ _ . _ _ _ | _____    |
| _____          | _____      | _ _ . _ _ . _ _ _ | _____    |
| _____          | _____      | _ _ . _ _ . _ _ _ | _____    |
| _____          | _____      | _ _ . _ _ . _ _ _ | _____    |
| _____          | _____      | _ _ . _ _ . _ _ _ | _____    |
| _____          | _____      | _ _ . _ _ . _ _ _ | _____    |
| _____          | _____      | _ _ . _ _ . _ _ _ | _____    |

13. Einnahmen von Nahrungsergänzungsmitteln?     nein     ja, welche

| Ergänzungsmittel | Wie oft, Dosis? | seit wann?        | weshalb? |
|------------------|-----------------|-------------------|----------|
| _____            | _____           | _ _ . _ _ . _ _ _ | _____    |
| _____            | _____           | _ _ . _ _ . _ _ _ | _____    |
| _____            | _____           | _ _ . _ _ . _ _ _ | _____    |
| _____            | _____           | _ _ . _ _ . _ _ _ | _____    |
| _____            | _____           | _ _ . _ _ . _ _ _ | _____    |

14. Rauchen Sie?  Nein                     Ja →  gelegentlich     täglich

Seit wie vielen Jahren?    |\_|\_|Jahr/e

Wie viele Zigaretten?        |\_|\_|\_| täglich



15. Haben Sie in der Vergangenheit geraucht?  Nie

Ja → Wie viele Jahre? |\_|\_|Jahr/e

Wie viele Zigaretten? |\_|\_|\_| täglich

**Erkrankungen:**

16. Welche anderen Erkrankungen sind bei Ihnen bekannt (z.B. Bluthochdruck, Diabetes mellitus etc.)?

keine

folgende Erkrankungen:

---

---

17. Bestehen dermatologische Erkrankungen wie ansteckende Hauterkrankungen oder anormale Hautreaktionen auf UV-Licht?

nein

ja, welche \_\_\_\_\_

18. Ist bei Ihnen jemals ein Vitamin-D-Mangel diagnostiziert worden?

ja  nein

Wenn ja,

- ist es therapiert worden?  ja  nein
- womit erfolgte die Therapie?
- wie lange hat die Therapie gedauert?

19. Hatten Sie jemals eine Depression?

ja  nein

20. Benutzen Sie im Sommer beim Sonnenbad zwischen 10 und 15Uhr eine Sonnencreme mit Lichtschutzfaktor?

immer

oft

gelegentlich

selten

nie

ich nehme kein Sonnenbad im Sommer

- Creme mit welchem Lichtschutzfaktor benutzen Sie in der Regel?

21. Ist bei Ihren Angehörigen 1. (Eltern, Geschwister, Kinder) oder 2. Grades (Großeltern, Tante, Onkel, Cousin/e) jemals ein Vitamin-D-Mangel diagnostiziert worden?

ja  nein

- Wenn ja, bei wem?

**22. Gibt/gab es bei Ihren Angehörigen 1. oder 2. Grades folgende Erkrankungen?**

- Osteoporose  ja  nein
  - o Wenn ja, bei wem?
- Rachitis  ja  nein
  - o Wenn ja, bei wem?
- Osteomalazie  ja  nein
  - o Wenn ja, bei wem?

**23. Gibt/gab es bei Ihren Angehörigen 1. oder 2. Grades Krebserkrankung?**

- ja  nein  
- wenn ja,

welche Krebserkrankung

bei wem?

**24. Gibt/gab es bei Ihren Angehörigen 1. oder 2. Grades Herz-Kreislaferkrankungen? (wie Bluthochdruck, Angina pectoris, Herzinfarkt, Schlaganfall)**

- ja  nein  
- wenn ja,

welche Herz-Kreislaferkrankungen

bei wem?

**25. Gibt/gab es bei Ihren Angehörigen 1. oder 2. Grades Autoimmunerkrankungen? (wie Rheumatoide Arthritis, Diabetes mellitus Typ 1, chronische Darmerkrankungen)**

- ja  nein  
- wenn ja,

welche Autoimmunerkrankungen

bei wem?

**Ernährung:****26. Wie oft essen Sie folgende Lebensmittel:****26.1 Eier**

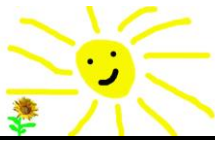

# MUVY-Pilotstudie

□□□□

|                                               |                              |                                                        |                                            |                                            |                                            |                                                        |
|-----------------------------------------------|------------------------------|--------------------------------------------------------|--------------------------------------------|--------------------------------------------|--------------------------------------------|--------------------------------------------------------|
| Ei, gekocht oder gebraten, Omelett (1 ganzes) | <input type="checkbox"/> Nie | <input type="checkbox"/> 1 mal pro Monat oder seltener | <input type="checkbox"/> 2-3 mal pro Monat | <input type="checkbox"/> 1-2 mal pro Woche | <input type="checkbox"/> 3-4 mal pro Woche | <input type="checkbox"/> 5 mal pro Woche oder häufiger |
| Eierpfannkuchen, Crêpes (2 Stück)             | <input type="checkbox"/> Nie | <input type="checkbox"/> 1 mal pro Monat oder seltener | <input type="checkbox"/> 2-3 mal pro Monat | <input type="checkbox"/> 1-2 mal pro Woche | <input type="checkbox"/> 3-4 mal pro Woche | <input type="checkbox"/> 5 mal pro Woche oder häufiger |

## 26.2 Fleisch und Wurstwaren

|                                         |                              |                                                        |                                            |                                            |                                                        |                                                        |
|-----------------------------------------|------------------------------|--------------------------------------------------------|--------------------------------------------|--------------------------------------------|--------------------------------------------------------|--------------------------------------------------------|
| Leber (eine Portion)                    | <input type="checkbox"/> Nie | <input type="checkbox"/> 1 mal pro Monat oder seltener | <input type="checkbox"/> 2-3 mal pro Monat | <input type="checkbox"/> 1-2 mal pro Woche | <input type="checkbox"/> 3 mal pro Woche oder häufiger |                                                        |
| Leberwurst, Leberpastete (eine Portion) | <input type="checkbox"/> Nie | <input type="checkbox"/> 1 mal pro Monat oder seltener | <input type="checkbox"/> 2-3 mal pro Monat | <input type="checkbox"/> 1-2 mal pro Woche | <input type="checkbox"/> 3-4 mal pro Woche             | <input type="checkbox"/> 5 mal pro Woche oder häufiger |

## 26.3 Fisch

|                                                                                                       |                              |                                                        |                                            |                                            |                                                        |
|-------------------------------------------------------------------------------------------------------|------------------------------|--------------------------------------------------------|--------------------------------------------|--------------------------------------------|--------------------------------------------------------|
| Fetter Fisch (Sardinen, Hering, Thunfisch, Matjeshering, Makrele, Lachs, Aal, Forelle) (eine Portion) | <input type="checkbox"/> Nie | <input type="checkbox"/> 1 mal pro Monat oder seltener | <input type="checkbox"/> 2-3 mal pro Monat | <input type="checkbox"/> 1-2 mal pro Woche | <input type="checkbox"/> 3 mal pro Woche oder häufiger |
| Fettarmer Fisch (Heilbutt, Seelachs, Zander, Scholle) (eine Portion)                                  | <input type="checkbox"/> Nie | <input type="checkbox"/> 1 mal pro Monat oder seltener | <input type="checkbox"/> 2-3 mal pro Monat | <input type="checkbox"/> 1-2 mal pro Woche | <input type="checkbox"/> 3 mal pro Woche oder häufiger |
| Fischzubereitung (z. B. Fischfilet, -stäbchen, -frikadellen) (eine Portion)                           | <input type="checkbox"/> Nie | <input type="checkbox"/> 1 mal pro Monat oder seltener | <input type="checkbox"/> 2-3 mal pro Monat | <input type="checkbox"/> 1-2 mal pro Woche | <input type="checkbox"/> 3 mal pro Woche oder häufiger |
| Meeresfrüchte (z. B. Muscheln, Tintenfische, Garnelen, Krabben, Langusten, Hummer) (eine Portion)     | <input type="checkbox"/> Nie | <input type="checkbox"/> 1 mal pro Monat oder seltener | <input type="checkbox"/> 2-3 mal pro Monat | <input type="checkbox"/> 1-2 mal pro Woche | <input type="checkbox"/> 3 mal pro Woche oder häufiger |

## 26.4 Milch, Milchprodukte, Käse

|               |                              |                                                        |                                            |                                            |                                            |                                            |                                          |                                                      |
|---------------|------------------------------|--------------------------------------------------------|--------------------------------------------|--------------------------------------------|--------------------------------------------|--------------------------------------------|------------------------------------------|------------------------------------------------------|
| Milch (150ml) | <input type="checkbox"/> Nie | <input type="checkbox"/> 1 mal pro Monat oder seltener | <input type="checkbox"/> 2-3 mal pro Monat | <input type="checkbox"/> 1-2 mal pro Woche | <input type="checkbox"/> 3-4 mal pro Woche | <input type="checkbox"/> 5-6 mal pro Woche | <input type="checkbox"/> 1-2 mal pro Tag | <input type="checkbox"/> 3 mal pro Tag oder häufiger |
|---------------|------------------------------|--------------------------------------------------------|--------------------------------------------|--------------------------------------------|--------------------------------------------|--------------------------------------------|------------------------------------------|------------------------------------------------------|



**MUVY-Pilotstudie**

\_|\_|\_|\_|

|                                                                        |                              |                                                        |                                            |                                            |                                            |                                            |                                                      |
|------------------------------------------------------------------------|------------------------------|--------------------------------------------------------|--------------------------------------------|--------------------------------------------|--------------------------------------------|--------------------------------------------|------------------------------------------------------|
| Kakao, Fruchtmilch (150ml)                                             | <input type="checkbox"/> Nie | <input type="checkbox"/> 1 mal pro Monat oder seltener | <input type="checkbox"/> 2-3 mal pro Monat | <input type="checkbox"/> 1-2 mal pro Woche | <input type="checkbox"/> 3-4 mal pro Woche | <input type="checkbox"/> 5-6 mal pro Woche | <input type="checkbox"/> 1 mal pro Tag oder häufiger |
| Naturjoghurt, Buttermilch (150 g)                                      | <input type="checkbox"/> Nie | <input type="checkbox"/> 1 mal pro Monat oder seltener | <input type="checkbox"/> 2-3 mal pro Monat | <input type="checkbox"/> 1-2 mal pro Woche | <input type="checkbox"/> 3-4 mal pro Woche | <input type="checkbox"/> 5-6 mal pro Woche | <input type="checkbox"/> 1 mal pro Tag oder häufiger |
| Dickmilch, Kefir (150 g)                                               | <input type="checkbox"/> Nie | <input type="checkbox"/> 1 mal pro Monat oder seltener | <input type="checkbox"/> 2-3 mal pro Monat | <input type="checkbox"/> 1-2 mal pro Woche | <input type="checkbox"/> 3-4 mal pro Woche | <input type="checkbox"/> 5-6 mal pro Woche | <input type="checkbox"/> 1 mal pro Tag oder häufiger |
| Fruchtojoghurt (150 g)                                                 | <input type="checkbox"/> Nie | <input type="checkbox"/> 1 mal pro Monat oder seltener | <input type="checkbox"/> 2-3 mal pro Monat | <input type="checkbox"/> 1-2 mal pro Woche | <input type="checkbox"/> 3-4 mal pro Woche | <input type="checkbox"/> 5-6 mal pro Woche | <input type="checkbox"/> 1 mal pro Tag oder häufiger |
| Quark, Kräuterquark (kein Früchtequark) (1 Esslöffel, gehäuft)         | <input type="checkbox"/> Nie | <input type="checkbox"/> 1 mal pro Monat oder seltener | <input type="checkbox"/> 2-3 mal pro Monat | <input type="checkbox"/> 1-2 mal pro Woche | <input type="checkbox"/> 3-4 mal pro Woche | <input type="checkbox"/> 5-6 mal pro Woche | <input type="checkbox"/> 1 mal pro Tag oder häufiger |
| Frischkäse (Rahmstufe, Doppelrahmstufe) (1 Esslöffel, gehäuft)         | <input type="checkbox"/> Nie | <input type="checkbox"/> 1 mal pro Monat oder seltener | <input type="checkbox"/> 2-3 mal pro Monat | <input type="checkbox"/> 1-2 mal pro Woche | <input type="checkbox"/> 3-4 mal pro Woche | <input type="checkbox"/> 5-6 mal pro Woche | <input type="checkbox"/> 1 mal pro Tag oder häufiger |
| Molkenkäse (z. B. Hüttenkäse, Ricotta) (eine Portion)                  | <input type="checkbox"/> Nie | <input type="checkbox"/> 1 mal pro Monat oder seltener | <input type="checkbox"/> 2-3 mal pro Monat | <input type="checkbox"/> 1-2 mal pro Woche | <input type="checkbox"/> 3-4 mal pro Woche | <input type="checkbox"/> 5-6 mal pro Woche | <input type="checkbox"/> 1 mal pro Tag oder häufiger |
| Weichkäse (z. B. Camembert, Brie) (eine Portion)                       | <input type="checkbox"/> Nie | <input type="checkbox"/> 1 mal pro Monat oder seltener | <input type="checkbox"/> 2-3 mal pro Monat | <input type="checkbox"/> 1-2 mal pro Woche | <input type="checkbox"/> 3-4 mal pro Woche | <input type="checkbox"/> 5-6 mal pro Woche | <input type="checkbox"/> 1 mal pro Tag oder häufiger |
| Schnittkäse (z. B. Gouda, Emmentaler, Tilsiter, Edamer) (eine Portion) | <input type="checkbox"/> Nie | <input type="checkbox"/> 1 mal pro Monat oder seltener | <input type="checkbox"/> 2-3 mal pro Monat | <input type="checkbox"/> 1-2 mal pro Woche | <input type="checkbox"/> 3-4 mal pro Woche | <input type="checkbox"/> 5-6 mal pro Woche | <input type="checkbox"/> 1 mal pro Tag oder häufiger |
| Mozarella, Mascarpone, Feta (eine Portion)                             | <input type="checkbox"/> Nie | <input type="checkbox"/> 1 mal pro Monat oder seltener | <input type="checkbox"/> 2-3 mal pro Monat | <input type="checkbox"/> 1-2 mal pro Woche | <input type="checkbox"/> 3-4 mal pro Woche | <input type="checkbox"/> 5-6 mal pro Woche | <input type="checkbox"/> 1 mal pro Tag oder häufiger |

**26.5 Gemüse**

|                                                      |                              |                                                        |                                            |                                            |                                                        |
|------------------------------------------------------|------------------------------|--------------------------------------------------------|--------------------------------------------|--------------------------------------------|--------------------------------------------------------|
| Spinat, Mangold (eine Portion)                       | <input type="checkbox"/> Nie | <input type="checkbox"/> 1 mal pro Monat oder seltener | <input type="checkbox"/> 2-3 mal pro Monat | <input type="checkbox"/> 1-2 mal pro Woche | <input type="checkbox"/> 3 mal pro Woche oder häufiger |
| Sauerkraut (eine Portion)                            | <input type="checkbox"/> Nie | <input type="checkbox"/> 1 mal pro Monat oder seltener | <input type="checkbox"/> 2-3 mal pro Monat | <input type="checkbox"/> 1-2 mal pro Woche | <input type="checkbox"/> 3 mal pro Woche oder häufiger |
| Weiß-, Blumenkohl, Broccoli, Kohlrabi (eine Portion) | <input type="checkbox"/> Nie | <input type="checkbox"/> 1 mal pro Monat oder seltener | <input type="checkbox"/> 2-3 mal pro Monat | <input type="checkbox"/> 1-2 mal pro Woche | <input type="checkbox"/> 3 mal pro Woche oder häufiger |

**26.6 Fette/Öle****26.6.1 Wenn Sie Fleisch oder Fisch aßen, wie oft waren diese mit folgenden Fetten oder Ölen zubereitet?**

|                                            |                              |                                 |                                 |                                |                                     |
|--------------------------------------------|------------------------------|---------------------------------|---------------------------------|--------------------------------|-------------------------------------|
| Butter                                     | <input type="checkbox"/> Nie | <input type="checkbox"/> Selten | <input type="checkbox"/> Häufig | <input type="checkbox"/> Immer | <input type="checkbox"/> Weiß nicht |
| Margarine                                  | <input type="checkbox"/> Nie | <input type="checkbox"/> Selten | <input type="checkbox"/> Häufig | <input type="checkbox"/> Immer | <input type="checkbox"/> Weiß nicht |
| tierisches Kochfett (z. B. Schmalz, Speck) | <input type="checkbox"/> Nie | <input type="checkbox"/> Selten | <input type="checkbox"/> Häufig | <input type="checkbox"/> Immer | <input type="checkbox"/> Weiß nicht |
| Olivenöl                                   | <input type="checkbox"/> Nie | <input type="checkbox"/> Selten | <input type="checkbox"/> Häufig | <input type="checkbox"/> Immer | <input type="checkbox"/> Weiß nicht |
| Sonnenblumen-, Keimöl oder anderes Öl      | <input type="checkbox"/> Nie | <input type="checkbox"/> Selten | <input type="checkbox"/> Häufig | <input type="checkbox"/> Immer | <input type="checkbox"/> Weiß nicht |

**26.6.2 Wenn Sie Gemüse aßen, wie oft war es mit folgenden Fetten oder Ölen zubereitet bzw. wie oft wurden diese Fette oder Öle zugegeben ?**

|                                                        |                              |                                 |                                 |                                |                                     |
|--------------------------------------------------------|------------------------------|---------------------------------|---------------------------------|--------------------------------|-------------------------------------|
| Butter                                                 | <input type="checkbox"/> Nie | <input type="checkbox"/> Selten | <input type="checkbox"/> Häufig | <input type="checkbox"/> Immer | <input type="checkbox"/> Weiß nicht |
| Margarine                                              | <input type="checkbox"/> Nie | <input type="checkbox"/> Selten | <input type="checkbox"/> Häufig | <input type="checkbox"/> Immer | <input type="checkbox"/> Weiß nicht |
| tierisches Kochfett (z. B. Schmalz, Speck)             | <input type="checkbox"/> Nie | <input type="checkbox"/> Selten | <input type="checkbox"/> Häufig | <input type="checkbox"/> Immer | <input type="checkbox"/> Weiß nicht |
| Olivenöl                                               | <input type="checkbox"/> Nie | <input type="checkbox"/> Selten | <input type="checkbox"/> Häufig | <input type="checkbox"/> Immer | <input type="checkbox"/> Weiß nicht |
| Leinöl, Sonnenblumen-, Distel-, Keimöl oder anderes Öl | <input type="checkbox"/> Nie | <input type="checkbox"/> Selten | <input type="checkbox"/> Häufig | <input type="checkbox"/> Immer | <input type="checkbox"/> Weiß nicht |

**26.6.3 Brotaufstrich**

|                            |                              |                                 |                                   |                                 |                                |
|----------------------------|------------------------------|---------------------------------|-----------------------------------|---------------------------------|--------------------------------|
| Butter auf Brot            | <input type="checkbox"/> Nie | <input type="checkbox"/> Selten | <input type="checkbox"/> Manchmal | <input type="checkbox"/> Häufig | <input type="checkbox"/> Immer |
| Margarine auf Brot         | <input type="checkbox"/> Nie | <input type="checkbox"/> Selten | <input type="checkbox"/> Manchmal | <input type="checkbox"/> Häufig | <input type="checkbox"/> Immer |
| Halbfettmargarine auf Brot | <input type="checkbox"/> Nie | <input type="checkbox"/> Selten | <input type="checkbox"/> Manchmal | <input type="checkbox"/> Häufig | <input type="checkbox"/> Immer |
| Olivenöl auf Brot          | <input type="checkbox"/> Nie | <input type="checkbox"/> Selten | <input type="checkbox"/> Manchmal | <input type="checkbox"/> Häufig | <input type="checkbox"/> Immer |

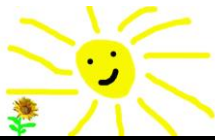

**27. Abschätzung des Hauttyps (nach RTS)**

|   |                                                                                                                                                            |   |
|---|------------------------------------------------------------------------------------------------------------------------------------------------------------|---|
| 1 | <b>Welchen Farbton weist Ihre unbestrahlte Haut auf?</b>                                                                                                   |   |
|   | Rötlich                                                                                                                                                    | 1 |
|   | Weißlich                                                                                                                                                   | 2 |
|   | Leicht beige                                                                                                                                               | 3 |
|   | Bräunlich                                                                                                                                                  | 4 |
| 2 | <b>Hat Ihre Haut Sommersprossen?</b>                                                                                                                       |   |
|   | Ja, viele                                                                                                                                                  | 1 |
|   | Ja, einige                                                                                                                                                 | 2 |
|   | Ja, aber nur vereinzelt                                                                                                                                    | 3 |
|   | Nein                                                                                                                                                       | 4 |
| 3 | <b>Wie reagiert Ihre Gesichtshaut auf die Sonne ?</b>                                                                                                      |   |
|   | Sehr empfindlich, meist Hautspannen                                                                                                                        | 1 |
|   | Empfindlich, teilweise Hautspannen                                                                                                                         | 2 |
|   | Normal empfindlich, nur selten Hautspannen                                                                                                                 | 3 |
|   | Unempfindlich, ohne Hautspannen                                                                                                                            | 4 |
| 4 | <b>Wie lange können Sie sich im Frühsommer in Deutschland am Mittag bei wolkenlosem Himmel in der Sonne aufhalten, ohne einen Sonnenbrand zu bekommen?</b> |   |
|   | Weniger als 15 Minuten                                                                                                                                     | 1 |
|   | Zwischen 15 und 25 Minuten                                                                                                                                 | 2 |
|   | Zwischen 25 und 40 Minuten                                                                                                                                 | 3 |
|   | Länger als 40 Minuten                                                                                                                                      | 4 |
| 5 | <b>Wie reagiert Ihre Haut auf ein längeres Sonnenbad?</b>                                                                                                  |   |
|   | Stets mit einem Sonnenbrand                                                                                                                                | 1 |
|   | Meist mit einem Sonnenbrand                                                                                                                                | 2 |
|   | Oftmals mit einem Sonnenbrand                                                                                                                              | 3 |
|   | Selten oder nie mit Sonnenbrand                                                                                                                            | 4 |
| 6 | <b>Wie wirkt sich bei Ihnen ein Sonnenbrand aus?</b>                                                                                                       |   |
|   | Kräftige Rötung, teilweise schmerzhaft und Bläschenbildung, danach schält sich die Haut                                                                    | 1 |
|   | Deutliche Rötung, danach schält sich die Haut                                                                                                              | 2 |
|   | Rötung, danach schält sich die Haut manchmal                                                                                                               | 3 |
|   | Fast nie Rötung und Hautschälen                                                                                                                            | 4 |



**MUVY-Pilotstudie**

□□□□

|                                                       |                                                                                                        |   |
|-------------------------------------------------------|--------------------------------------------------------------------------------------------------------|---|
| 7                                                     | <b>Ist bei Ihnen nach einmaligem, längerem Sonnenbad anschließend ein Bräunungseffekt zu erkennen?</b> |   |
|                                                       | Nie                                                                                                    | 1 |
|                                                       | Meist nicht                                                                                            | 2 |
|                                                       | Oftmals                                                                                                | 3 |
|                                                       | Meist                                                                                                  | 4 |
| 8                                                     | <b>Wie entwickelt sich bei Ihnen die Hautbräunung nach wiederholtem Sonnenbad?</b>                     |   |
|                                                       | Kaum oder gar keine Bräunung                                                                           | 1 |
|                                                       | Leichte Bräunung nach mehreren Sonnenbädern                                                            | 2 |
|                                                       | Fortschreitende, deutlicher werdende Bräunung                                                          | 3 |
|                                                       | Schnell einsetzende und tiefe Bräunung                                                                 | 4 |
| 9                                                     | <b>Welche Angabe entspricht am ehesten Ihrer natürlichen Haarfarbe?</b>                                |   |
|                                                       | Rot bis rötlich braun                                                                                  | 1 |
|                                                       | Hellblond bis blond                                                                                    | 2 |
|                                                       | Dunkelblond bis braun                                                                                  | 3 |
|                                                       | Dunkelbraun bis schwarz                                                                                | 4 |
| 10                                                    | <b>Welche Farbe haben Ihre Augen</b>                                                                   |   |
|                                                       | Hellblau, hellgrau oder hellgrün                                                                       | 1 |
|                                                       | Blau, grau oder grün                                                                                   | 2 |
|                                                       | Hellbraun oder dunkelgrau                                                                              | 3 |
|                                                       | Dunkelbraun                                                                                            | 4 |
| <b>Summe (<math>\Sigma</math>)</b>                    |                                                                                                        |   |
| <b>Geschätzter Hauttyp (= <math>\Sigma/10</math>)</b> |                                                                                                        |   |

**Unterschrift:** ..... **Datum:** .....



**28 Beck Depression Inventar (BDI) – Tag 1**

Dieser Fragebogen enthält 21 Gruppen von Aussagen. Bitte lesen Sie jede Gruppe sorgfältig durch. Suchen Sie dann die Aussage in der Gruppe Heraus, die am Besten beschreibt, wie Sie sich in dieser Woche einschließlich heute gefühlt haben und kreuzen Sie die dazugehörige Ziffer (⓪①② oder ③) an. Falls mehrere Aussagen eine Gruppe zutreffen, können Sie auch mehrere Ziffern markieren. Lesen Sie auf jeden Fall alle Aussagen in jeder Gruppe, bevor Sie Ihre Wahl treffen.

- |                                                                                                         |                                     |                                                                                    |                                     |
|---------------------------------------------------------------------------------------------------------|-------------------------------------|------------------------------------------------------------------------------------|-------------------------------------|
| <b>A</b>                                                                                                | <input checked="" type="checkbox"/> | <b>F</b>                                                                           | <input checked="" type="checkbox"/> |
| Ich bin nicht traurig.                                                                                  | ⓪                                   | Ich habe nicht das Gefühl, gestraft zu sein.                                       | ⓪                                   |
| Ich bin traurig.                                                                                        | ①                                   | Ich habe das Gefühl, vielleicht bestraft zu werden.                                | ①                                   |
| Ich bin die ganze Zeit traurig und komme nicht davon los.                                               | ②                                   | Ich erwarte, bestraft zu werden.                                                   | ②                                   |
| Ich bin so traurig, dass ich es kaum noch ertrage.                                                      | ③                                   | Ich habe das Gefühl, bestraft zu sein.                                             | ③                                   |
| <b>B</b>                                                                                                | <input checked="" type="checkbox"/> | <b>G</b>                                                                           | <input checked="" type="checkbox"/> |
| Ich sehe nicht besonders mutlos in die Zukunft.                                                         | ⓪                                   | Ich bin nicht von mir enttäuscht.                                                  | ⓪                                   |
| Ich sehe mutlos in die Zukunft.                                                                         | ①                                   | Ich bin von mir enttäuscht.                                                        | ①                                   |
| Ich habe nichts, worauf ich mich freuen kann.                                                           | ②                                   | Ich finde mich fürchterlich.                                                       | ②                                   |
| Ich habe das Gefühl dass die Zukunft hoffnungslos ist, und dass die Situation nicht besser werden kann. | ③                                   | Ich hasse mich.                                                                    | ③                                   |
| <b>C</b>                                                                                                | <input checked="" type="checkbox"/> | <b>H</b>                                                                           | <input checked="" type="checkbox"/> |
| Ich fühle mich nicht als Versager.                                                                      | ⓪                                   | Ich habe nicht das Gefühl, schlechter zu sein als alle anderen.                    | ⓪                                   |
| Ich habe das Gefühl, öfter versagt zu haben, als der Durchschnitt.                                      | ①                                   | Ich kritisiere mich wegen meiner Fehler und Schwächen.                             | ①                                   |
| Wenn ich auf mein Leben zurückblicke, sehe ich bloß eine Menge Fehlschläge.                             | ②                                   | Ich mache mir die ganze Zeit Vorwürfe wegen meiner Mängel.                         | ②                                   |
| Ich habe das Gefühl, als Mensch ein völliger Versager zu sein.                                          | ③                                   | Ich gebe mir für alles die Schuld, was schief geht.                                | ③                                   |
| <b>D</b>                                                                                                | <input checked="" type="checkbox"/> | <b>I</b>                                                                           | <input checked="" type="checkbox"/> |
| Ich kann die Dinge genauso genießen, wie früher.                                                        | ⓪                                   | Ich denke nicht daran, mir etwas anzutun.                                          | ⓪                                   |
| Ich kann die Dinge nicht mehr so genießen wie früher.                                                   | ①                                   | Ich denke manchmal an Selbstmord, aber ich würde es nicht tun.                     | ①                                   |
| Ich kann aus nichts mehr eine echte Befriedigung ziehen.                                                | ②                                   | Ich möchte mich am liebsten umbringen.                                             | ②                                   |
| Ich bin mit allem unzufrieden oder gelangweilt.                                                         | ③                                   | Ich würde mich umbringen, wenn ich die Gelegenheit hätte.                          | ③                                   |
| <b>E</b>                                                                                                | <input checked="" type="checkbox"/> | <b>J</b>                                                                           | <input checked="" type="checkbox"/> |
| Ich habe keine Schuldgefühle.                                                                           | ⓪                                   | Ich weine nicht öfter als früher.                                                  | ⓪                                   |
| Ich habe häufig Schuldgefühle.                                                                          | ①                                   | Ich weine jetzt mehr als früher.                                                   | ①                                   |
| Ich habe fast immer Schuldgefühle.                                                                      | ②                                   | Ich weine jetzt die ganze Zeit.                                                    | ②                                   |
| Ich habe immer Schuldgefühle.                                                                           | ③                                   | Früher konnte ich weinen, aber jetzt kann ich es nicht mehr, obwohl ich es möchte. | ③                                   |

**Punkte subtotal Seite 1: \_\_\_\_\_**



## MUVY-Pilotstudie

|\_|\_|\_|

- K**    
Ich bin nicht reizbarer als sonst. ①  
Ich bin jetzt leichter verärgert oder gereizt als früher. ①  
Ich fühle mich dauernd gereizt. ②  
Die Dinge, die mich früher geärgert haben, berühren mich kaum mehr. ③
- L**    
Ich habe nicht das Interesse an Menschen verloren. ①  
Ich interessiere mich jetzt weniger für Menschen als früher. ①  
Ich habe mein Interesse an anderen Menschen verloren. ②  
Ich habe mein ganzes Interesse an anderen Menschen verloren. ③
- M**    
Ich bin so entschlossen wie immer. ①  
Ich schiebe Entscheidungen jetzt öfter als früher auf. ①  
Es fällt mir schwerer als früher Entscheidungen zu treffen. ②  
Ich kann überhaupt keine Entscheidungen mehr treffen. ③
- N**    
Ich habe nicht das Gefühl, schlechter auszusehen als früher. ①  
Ich mache mir Sorgen, dass ich alt oder unattraktiv aussehe. ①  
Ich habe das Gefühl, dass Veränderungen in meinem Aussehen auftreten, die mich hässlich machen. ②  
Ich finde mich hässlich. ③
- O**    
Ich kann so gut arbeiten wie früher. ①  
Ich muss mir einen Ruck geben, bevor ich eine Tätigkeit in Angriff nehme. ①  
Ich muss mich zu jeder Tätigkeit zwingen. ②  
Ich bin unfähig zu arbeiten. ③
- P**    
Ich schlafe so gut wie sonst. ①  
Ich schlafe nicht mehr so gut wie früher. ①  
Ich wache 1 bis 2 Stunden früher auf als sonst, und es fällt mir schwer wieder einzuschlafen. ②  
Ich wache mehrere Stunden früher auf als sonst und kann nicht mehr einschlafen. ③

- Q**    
Ich ermüde nicht stärker als sonst. ①  
Ich ermüde schneller als früher. ①  
Fast alles ermüdet mich. ②  
Ich bin zu müde, um etwas zu tun. ③
- R**    
Mein Appetit ist nicht schlechter als sonst. ①  
Mein Appetit ist nicht mehr so gut wie früher. ①  
Mein Appetit hat sehr stark nachgelassen. ②  
Ich habe überhaupt keinen Appetit mehr. ③
- S**    
Ich habe in letzter Zeit kaum abgenommen. ①  
Ich habe mehr als 2 Kilo abgenommen. ①  
Ich habe mehr als 5 Kilo abgenommen. ②  
Ich habe mehr als 8 Kilo abgenommen. ③  
Ich esse absichtlich weniger, um abzunehmen: JA NEIN
- T**    
Ich mache mir keine größeren Sorgen um meine Gesundheit als sonst. ①  
Ich mache mir Sorgen um körperliche Probleme, wie Schmerzen, Magenbeschwerden oder Verstopfung. ①  
Ich mache mir so große Sorgen über gesundheitliche Probleme, dass es mir schwer fällt, an etwas anderes zu denken. ②  
Ich mache mir so große Sorgen über gesundheitliche Probleme, dass ich an nichts anderes mehr denken kann. ③
- U**    
Ich habe in letzter Zeit keine Veränderung meines Interesses an Sex bemerkt. ①  
Ich interessiere mich weniger für Sex als früher. ①  
Ich interessiere mich jetzt viel weniger für Sex. ②  
Ich habe das Interesse an Sex völlig verloren. ③
- Subtotal Punkte Seite 2: \_\_\_\_\_  
Subtotal Punkteübertrag Seite 1: \_\_\_\_\_
- Summenwerte:** \_\_\_\_\_

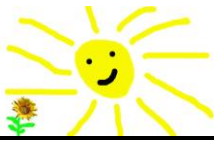**MUVY-Pilotstudie**

|\_|\_|\_|

**29 Profile of Mood States (POMS) – Tag 1**

Die folgenden Worte beschreiben verschiedene Gefühle. Bitte kreuzen Sie für jedes Wort den Kreis ☉ an, der am besten Ihre Gefühle während der vergangenen 24 Stunden beschreibt.

**Seit gestern fühle ich mich:**

|    |                  | <b>0</b><br>= gar nicht | <b>1</b><br>= etwas   | <b>2</b><br>=ziemlich | <b>3</b><br>=stark    | <b>4</b><br>=sehr stark |
|----|------------------|-------------------------|-----------------------|-----------------------|-----------------------|-------------------------|
| 1  | zornig           | <input type="radio"/>   | <input type="radio"/> | <input type="radio"/> | <input type="radio"/> | <input type="radio"/>   |
| 2  | abgeschlafft     | <input type="radio"/>   | <input type="radio"/> | <input type="radio"/> | <input type="radio"/> | <input type="radio"/>   |
| 3  | unglücklich      | <input type="radio"/>   | <input type="radio"/> | <input type="radio"/> | <input type="radio"/> | <input type="radio"/>   |
| 4  | lebhaft          | <input type="radio"/>   | <input type="radio"/> | <input type="radio"/> | <input type="radio"/> | <input type="radio"/>   |
| 5  | unsicher         | <input type="radio"/>   | <input type="radio"/> | <input type="radio"/> | <input type="radio"/> | <input type="radio"/>   |
| 6  | lustlos          | <input type="radio"/>   | <input type="radio"/> | <input type="radio"/> | <input type="radio"/> | <input type="radio"/>   |
| 7  | traurig          | <input type="radio"/>   | <input type="radio"/> | <input type="radio"/> | <input type="radio"/> | <input type="radio"/>   |
| 8  | aktiv            | <input type="radio"/>   | <input type="radio"/> | <input type="radio"/> | <input type="radio"/> | <input type="radio"/>   |
| 9  | gereizt          | <input type="radio"/>   | <input type="radio"/> | <input type="radio"/> | <input type="radio"/> | <input type="radio"/>   |
| 10 | verdrießlich     | <input type="radio"/>   | <input type="radio"/> | <input type="radio"/> | <input type="radio"/> | <input type="radio"/>   |
| 11 | betrübt          | <input type="radio"/>   | <input type="radio"/> | <input type="radio"/> | <input type="radio"/> | <input type="radio"/>   |
| 12 | energisch        | <input type="radio"/>   | <input type="radio"/> | <input type="radio"/> | <input type="radio"/> | <input type="radio"/>   |
| 13 | ängstlich        | <input type="radio"/>   | <input type="radio"/> | <input type="radio"/> | <input type="radio"/> | <input type="radio"/>   |
| 14 | hoffnungslos     | <input type="radio"/>   | <input type="radio"/> | <input type="radio"/> | <input type="radio"/> | <input type="radio"/>   |
| 15 | überreizt        | <input type="radio"/>   | <input type="radio"/> | <input type="radio"/> | <input type="radio"/> | <input type="radio"/>   |
| 16 | müde             | <input type="radio"/>   | <input type="radio"/> | <input type="radio"/> | <input type="radio"/> | <input type="radio"/>   |
| 17 | verärgert        | <input type="radio"/>   | <input type="radio"/> | <input type="radio"/> | <input type="radio"/> | <input type="radio"/>   |
| 18 | entmutigt        | <input type="radio"/>   | <input type="radio"/> | <input type="radio"/> | <input type="radio"/> | <input type="radio"/>   |
| 19 | neidisch         | <input type="radio"/>   | <input type="radio"/> | <input type="radio"/> | <input type="radio"/> | <input type="radio"/>   |
| 20 | fröhlich         | <input type="radio"/>   | <input type="radio"/> | <input type="radio"/> | <input type="radio"/> | <input type="radio"/>   |
| 21 | verbittert       | <input type="radio"/>   | <input type="radio"/> | <input type="radio"/> | <input type="radio"/> | <input type="radio"/>   |
| 22 | erschöpft        | <input type="radio"/>   | <input type="radio"/> | <input type="radio"/> | <input type="radio"/> | <input type="radio"/>   |
| 23 | schwermütig      | <input type="radio"/>   | <input type="radio"/> | <input type="radio"/> | <input type="radio"/> | <input type="radio"/>   |
| 24 | verzweifelt      | <input type="radio"/>   | <input type="radio"/> | <input type="radio"/> | <input type="radio"/> | <input type="radio"/>   |
| 25 | träge            | <input type="radio"/>   | <input type="radio"/> | <input type="radio"/> | <input type="radio"/> | <input type="radio"/>   |
| 26 | hilflos          | <input type="radio"/>   | <input type="radio"/> | <input type="radio"/> | <input type="radio"/> | <input type="radio"/>   |
| 27 | ermattet         | <input type="radio"/>   | <input type="radio"/> | <input type="radio"/> | <input type="radio"/> | <input type="radio"/>   |
| 28 | munter           | <input type="radio"/>   | <input type="radio"/> | <input type="radio"/> | <input type="radio"/> | <input type="radio"/>   |
| 29 | wütend           | <input type="radio"/>   | <input type="radio"/> | <input type="radio"/> | <input type="radio"/> | <input type="radio"/>   |
| 30 | schwungvoll      | <input type="radio"/>   | <input type="radio"/> | <input type="radio"/> | <input type="radio"/> | <input type="radio"/>   |
| 31 | schlecht gelaunt | <input type="radio"/>   | <input type="radio"/> | <input type="radio"/> | <input type="radio"/> | <input type="radio"/>   |
| 32 | minderwertig     | <input type="radio"/>   | <input type="radio"/> | <input type="radio"/> | <input type="radio"/> | <input type="radio"/>   |
| 33 | erschreckt       | <input type="radio"/>   | <input type="radio"/> | <input type="radio"/> | <input type="radio"/> | <input type="radio"/>   |
| 34 | tatkräftig       | <input type="radio"/>   | <input type="radio"/> | <input type="radio"/> | <input type="radio"/> | <input type="radio"/>   |
| 35 | entkräftet       | <input type="radio"/>   | <input type="radio"/> | <input type="radio"/> | <input type="radio"/> | <input type="radio"/>   |
| 36 | nervös           | <input type="radio"/>   | <input type="radio"/> | <input type="radio"/> | <input type="radio"/> | <input type="radio"/>   |
| 37 | ruhig            | <input type="radio"/>   | <input type="radio"/> | <input type="radio"/> | <input type="radio"/> | <input type="radio"/>   |
| 38 | depressiv        | <input type="radio"/>   | <input type="radio"/> | <input type="radio"/> | <input type="radio"/> | <input type="radio"/>   |
| 39 | besorgt          | <input type="radio"/>   | <input type="radio"/> | <input type="radio"/> | <input type="radio"/> | <input type="radio"/>   |
| 40 | heiter           | <input type="radio"/>   | <input type="radio"/> | <input type="radio"/> | <input type="radio"/> | <input type="radio"/>   |
| 41 | gut drauf        | <input type="radio"/>   | <input type="radio"/> | <input type="radio"/> | <input type="radio"/> | <input type="radio"/>   |
| 42 | hungrig          | <input type="radio"/>   | <input type="radio"/> | <input type="radio"/> | <input type="radio"/> | <input type="radio"/>   |
| 43 | gesprächig       | <input type="radio"/>   | <input type="radio"/> | <input type="radio"/> | <input type="radio"/> | <input type="radio"/>   |
| 44 | glücklich        | <input type="radio"/>   | <input type="radio"/> | <input type="radio"/> | <input type="radio"/> | <input type="radio"/>   |
| 45 | schläfrig        | <input type="radio"/>   | <input type="radio"/> | <input type="radio"/> | <input type="radio"/> | <input type="radio"/>   |
| 46 | schmerzgeplagt   | <input type="radio"/>   | <input type="radio"/> | <input type="radio"/> | <input type="radio"/> | <input type="radio"/>   |

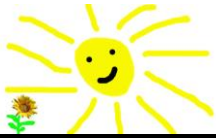**30 Beck Depression Inventar (BDI) – Tag 8**

Dieser Fragebogen enthält 21 Gruppen von Aussagen. Bitte lesen Sie jede Gruppe sorgfältig durch. Suchen Sie dann die Aussage in der Gruppe heraus, die am Besten beschreibt, wie Sie sich in dieser Woche einschließlich heute gefühlt haben und kreuzen Sie die dazugehörige Ziffer (⓪①② oder ③) an. Falls mehrere Aussagen eine Gruppe zutreffen, können Sie auch mehrere Ziffern markieren. Lesen Sie auf jeden Fall alle Aussagen in jeder Gruppe, bevor Sie Ihre Wahl treffen.

- |                                                                                                         |                                     |  |                                                                                    |                                     |
|---------------------------------------------------------------------------------------------------------|-------------------------------------|--|------------------------------------------------------------------------------------|-------------------------------------|
| <b>A</b>                                                                                                | <input checked="" type="checkbox"/> |  | <b>F</b>                                                                           | <input checked="" type="checkbox"/> |
| Ich bin nicht traurig.                                                                                  | ⓪                                   |  | Ich habe nicht das Gefühl, gestraft zu sein.                                       | ⓪                                   |
| Ich bin traurig.                                                                                        | ①                                   |  | Ich habe das Gefühl, vielleicht bestraft zu werden.                                | ①                                   |
| Ich bin die ganze Zeit traurig und komme nicht davon los.                                               | ②                                   |  | Ich erwarte, bestraft zu werden.                                                   | ②                                   |
| Ich bin so traurig, dass ich es kaum noch ertrage.                                                      | ③                                   |  | Ich habe das Gefühl, bestraft zu sein.                                             | ③                                   |
| <b>B</b>                                                                                                | <input checked="" type="checkbox"/> |  | <b>G</b>                                                                           | <input checked="" type="checkbox"/> |
| Ich sehe nicht besonders mutlos in die Zukunft.                                                         | ⓪                                   |  | Ich bin nicht von mir enttäuscht.                                                  | ⓪                                   |
| Ich sehe mutlos in die Zukunft.                                                                         | ①                                   |  | Ich bin von mir enttäuscht.                                                        | ①                                   |
| Ich habe nichts, worauf ich mich freuen kann.                                                           | ②                                   |  | Ich finde mich fürchterlich.                                                       | ②                                   |
| Ich habe das Gefühl dass die Zukunft hoffnungslos ist, und dass die Situation nicht besser werden kann. | ③                                   |  | Ich hasse mich.                                                                    | ③                                   |
| <b>C</b>                                                                                                | <input checked="" type="checkbox"/> |  | <b>H</b>                                                                           | <input checked="" type="checkbox"/> |
| Ich fühle mich nicht als Versager.                                                                      | ⓪                                   |  | Ich habe nicht das Gefühl, schlechter zu sein als alle anderen.                    | ⓪                                   |
| Ich habe das Gefühl, öfter versagt zu haben, als der Durchschnitt.                                      | ①                                   |  | Ich kritisiere mich wegen meiner Fehler und Schwächen.                             | ①                                   |
| Wenn ich auf mein Leben zurückblicke, sehe ich bloß eine Menge Fehlschläge.                             | ②                                   |  | Ich mache mir die ganze Zeit Vorwürfe wegen meiner Mängel.                         | ②                                   |
| Ich habe das Gefühl, als Mensch ein völliger Versager zu sein.                                          | ③                                   |  | Ich gebe mir für alles die Schuld, was schief geht.                                | ③                                   |
| <b>D</b>                                                                                                | <input checked="" type="checkbox"/> |  | <b>I</b>                                                                           | <input checked="" type="checkbox"/> |
| Ich kann die Dinge genauso genießen, wie früher.                                                        | ⓪                                   |  | Ich denke nicht daran, mir etwas anzutun.                                          | ⓪                                   |
| Ich kann die Dinge nicht mehr so genießen wie früher.                                                   | ①                                   |  | Ich denke manchmal an Selbstmord, aber ich würde es nicht tun.                     | ①                                   |
| Ich kann aus nichts mehr eine echte Befriedigung ziehen.                                                | ②                                   |  | Ich möchte mich am liebsten umbringen.                                             | ②                                   |
| Ich bin mit allem unzufrieden oder gelangweilt.                                                         | ③                                   |  | Ich würde mich umbringen, wenn ich die Gelegenheit hätte.                          | ③                                   |
| <b>E</b>                                                                                                | <input checked="" type="checkbox"/> |  | <b>J</b>                                                                           | <input checked="" type="checkbox"/> |
| Ich habe keine Schuldgefühle.                                                                           | ⓪                                   |  | Ich weine nicht öfter als früher.                                                  | ⓪                                   |
| Ich habe häufig Schuldgefühle.                                                                          | ①                                   |  | Ich weine jetzt mehr als früher.                                                   | ①                                   |
| Ich habe fast immer Schuldgefühle.                                                                      | ②                                   |  | Ich weine jetzt die ganze Zeit.                                                    | ②                                   |
| Ich habe immer Schuldgefühle.                                                                           | ③                                   |  | Früher konnte ich weinen, aber jetzt kann ich es nicht mehr, obwohl ich es möchte. | ③                                   |

**Punkte subtotal Seite 1: \_\_\_\_\_**



## MUVY-Pilotstudie

|\_|\_|\_|

- K**    
Ich bin nicht reizbarer als sonst. ①  
Ich bin jetzt leichter verärgert oder gereizt als früher. ①  
Ich fühle mich dauernd gereizt. ②  
Die Dinge, die mich früher geärgert haben, berühren mich kaum mehr. ③
- L**    
Ich habe nicht das Interesse an Menschen verloren. ①  
Ich interessiere mich jetzt weniger für Menschen als früher. ①  
Ich habe mein Interesse an anderen Menschen verloren. ②  
Ich habe mein ganzes Interesse an anderen Menschen verloren. ③
- M**    
Ich bin so entschlossen wie immer. ①  
Ich schiebe Entscheidungen jetzt öfter als früher auf. ①  
Es fällt mir schwerer als früher Entscheidungen zu treffen. ②  
Ich kann überhaupt keine Entscheidungen mehr treffen. ③
- N**    
Ich habe nicht das Gefühl, schlechter auszusehen als früher. ①  
Ich mache mir Sorgen, dass ich alt oder unattraktiv aussehe. ①  
Ich habe das Gefühl, dass Veränderungen in meinem Aussehen auftreten, die mich hässlich machen. ②  
Ich finde mich hässlich. ③
- O**    
Ich kann so gut arbeiten wie früher. ①  
Ich muss mir einen Ruck geben, bevor ich eine Tätigkeit in Angriff nehme. ①  
Ich muss mich zu jeder Tätigkeit zwingen. ②  
Ich bin unfähig zu arbeiten. ③
- P**    
Ich schlafe so gut wie sonst. ①  
Ich schlafe nicht mehr so gut wie früher. ①  
Ich wache 1 bis 2 Stunden früher auf als sonst, und es fällt mir schwer wieder einzuschlafen. ②  
Ich wache mehrere Stunden früher auf als sonst und kann nicht mehr einschlafen. ③

- Q**    
Ich ermüde nicht stärker als sonst. ①  
Ich ermüde schneller als früher. ①  
Fast alles ermüdet mich. ②  
Ich bin zu müde, um etwas zu tun. ③
- R**    
Mein Appetit ist nicht schlechter als sonst. ①  
Mein Appetit ist nicht mehr so gut wie früher. ①  
Mein Appetit hat sehr stark nachgelassen. ②  
Ich habe überhaupt keinen Appetit mehr. ③
- S**    
Ich habe in letzter Zeit kaum abgenommen. ①  
Ich habe mehr als 2 Kilo abgenommen. ①  
Ich habe mehr als 5 Kilo abgenommen. ②  
Ich habe mehr als 8 Kilo abgenommen. ③  
Ich esse absichtlich weniger, um abzunehmen: JA NEIN
- T**    
Ich mache mir keine größeren Sorgen um meine Gesundheit als sonst. ①  
Ich mache mir Sorgen um körperliche Probleme, wie Schmerzen, Magenbeschwerden oder Verstopfung. ①  
Ich mache mir so große Sorgen über gesundheitliche Probleme, dass es mir schwer fällt, an etwas anderes zu denken. ②  
Ich mache mir so große Sorgen über gesundheitliche Probleme, dass ich an nichts anderes mehr denken kann. ③
- U**    
Ich habe in letzter Zeit keine Veränderung meines Interesses an Sex bemerkt. ①  
Ich interessiere mich weniger für Sex als früher. ①  
Ich interessiere mich jetzt viel weniger für Sex. ②  
Ich habe das Interesse an Sex völlig verloren. ③
- Subtotal Punkte Seite 2: \_\_\_\_\_  
Subtotal Punkteübertrag Seite 1: \_\_\_\_\_
- Summenwerte:** \_\_\_\_\_

**MUVY-Pilotstudie**

|\_|\_|\_|

**31 Profile of Mood States (POMS) – Tag 8**

Die folgenden Worte beschreiben verschiedene Gefühle. Bitte kreuzen Sie für jedes Wort den Kreis ☉ an, der am besten Ihre Gefühle während der vergangenen 24 Stunden beschreibt.

Seit gestern fühle ich mich:

|    |                  | 0<br>= gar nicht      | 1<br>= etwas          | 2<br>=ziemlich        | 3<br>=stark           | 4<br>=sehr stark      |
|----|------------------|-----------------------|-----------------------|-----------------------|-----------------------|-----------------------|
| 1  | zornig           | <input type="radio"/> | <input type="radio"/> | <input type="radio"/> | <input type="radio"/> | <input type="radio"/> |
| 2  | abgeschlafft     | <input type="radio"/> | <input type="radio"/> | <input type="radio"/> | <input type="radio"/> | <input type="radio"/> |
| 3  | unglücklich      | <input type="radio"/> | <input type="radio"/> | <input type="radio"/> | <input type="radio"/> | <input type="radio"/> |
| 4  | lebhaft          | <input type="radio"/> | <input type="radio"/> | <input type="radio"/> | <input type="radio"/> | <input type="radio"/> |
| 5  | unsicher         | <input type="radio"/> | <input type="radio"/> | <input type="radio"/> | <input type="radio"/> | <input type="radio"/> |
| 6  | lustlos          | <input type="radio"/> | <input type="radio"/> | <input type="radio"/> | <input type="radio"/> | <input type="radio"/> |
| 7  | traurig          | <input type="radio"/> | <input type="radio"/> | <input type="radio"/> | <input type="radio"/> | <input type="radio"/> |
| 8  | aktiv            | <input type="radio"/> | <input type="radio"/> | <input type="radio"/> | <input type="radio"/> | <input type="radio"/> |
| 9  | gereizt          | <input type="radio"/> | <input type="radio"/> | <input type="radio"/> | <input type="radio"/> | <input type="radio"/> |
| 10 | verdrießlich     | <input type="radio"/> | <input type="radio"/> | <input type="radio"/> | <input type="radio"/> | <input type="radio"/> |
| 11 | betrübt          | <input type="radio"/> | <input type="radio"/> | <input type="radio"/> | <input type="radio"/> | <input type="radio"/> |
| 12 | energisch        | <input type="radio"/> | <input type="radio"/> | <input type="radio"/> | <input type="radio"/> | <input type="radio"/> |
| 13 | ängstlich        | <input type="radio"/> | <input type="radio"/> | <input type="radio"/> | <input type="radio"/> | <input type="radio"/> |
| 14 | hoffnungslos     | <input type="radio"/> | <input type="radio"/> | <input type="radio"/> | <input type="radio"/> | <input type="radio"/> |
| 15 | überreizt        | <input type="radio"/> | <input type="radio"/> | <input type="radio"/> | <input type="radio"/> | <input type="radio"/> |
| 16 | müde             | <input type="radio"/> | <input type="radio"/> | <input type="radio"/> | <input type="radio"/> | <input type="radio"/> |
| 17 | verärgert        | <input type="radio"/> | <input type="radio"/> | <input type="radio"/> | <input type="radio"/> | <input type="radio"/> |
| 18 | entmutigt        | <input type="radio"/> | <input type="radio"/> | <input type="radio"/> | <input type="radio"/> | <input type="radio"/> |
| 19 | neidisch         | <input type="radio"/> | <input type="radio"/> | <input type="radio"/> | <input type="radio"/> | <input type="radio"/> |
| 20 | fröhlich         | <input type="radio"/> | <input type="radio"/> | <input type="radio"/> | <input type="radio"/> | <input type="radio"/> |
| 21 | verbittert       | <input type="radio"/> | <input type="radio"/> | <input type="radio"/> | <input type="radio"/> | <input type="radio"/> |
| 22 | erschöpft        | <input type="radio"/> | <input type="radio"/> | <input type="radio"/> | <input type="radio"/> | <input type="radio"/> |
| 23 | schwermütig      | <input type="radio"/> | <input type="radio"/> | <input type="radio"/> | <input type="radio"/> | <input type="radio"/> |
| 24 | verzweifelt      | <input type="radio"/> | <input type="radio"/> | <input type="radio"/> | <input type="radio"/> | <input type="radio"/> |
| 25 | träge            | <input type="radio"/> | <input type="radio"/> | <input type="radio"/> | <input type="radio"/> | <input type="radio"/> |
| 26 | hilflos          | <input type="radio"/> | <input type="radio"/> | <input type="radio"/> | <input type="radio"/> | <input type="radio"/> |
| 27 | ermattet         | <input type="radio"/> | <input type="radio"/> | <input type="radio"/> | <input type="radio"/> | <input type="radio"/> |
| 28 | munter           | <input type="radio"/> | <input type="radio"/> | <input type="radio"/> | <input type="radio"/> | <input type="radio"/> |
| 29 | wütend           | <input type="radio"/> | <input type="radio"/> | <input type="radio"/> | <input type="radio"/> | <input type="radio"/> |
| 30 | schwungvoll      | <input type="radio"/> | <input type="radio"/> | <input type="radio"/> | <input type="radio"/> | <input type="radio"/> |
| 31 | schlecht gelaunt | <input type="radio"/> | <input type="radio"/> | <input type="radio"/> | <input type="radio"/> | <input type="radio"/> |
| 32 | minderwertig     | <input type="radio"/> | <input type="radio"/> | <input type="radio"/> | <input type="radio"/> | <input type="radio"/> |
| 33 | erschreckt       | <input type="radio"/> | <input type="radio"/> | <input type="radio"/> | <input type="radio"/> | <input type="radio"/> |
| 34 | tatkräftig       | <input type="radio"/> | <input type="radio"/> | <input type="radio"/> | <input type="radio"/> | <input type="radio"/> |
| 35 | entkräftet       | <input type="radio"/> | <input type="radio"/> | <input type="radio"/> | <input type="radio"/> | <input type="radio"/> |
| 36 | nervös           | <input type="radio"/> | <input type="radio"/> | <input type="radio"/> | <input type="radio"/> | <input type="radio"/> |
| 37 | ruhig            | <input type="radio"/> | <input type="radio"/> | <input type="radio"/> | <input type="radio"/> | <input type="radio"/> |
| 38 | depressiv        | <input type="radio"/> | <input type="radio"/> | <input type="radio"/> | <input type="radio"/> | <input type="radio"/> |
| 39 | besorgt          | <input type="radio"/> | <input type="radio"/> | <input type="radio"/> | <input type="radio"/> | <input type="radio"/> |
| 40 | heiter           | <input type="radio"/> | <input type="radio"/> | <input type="radio"/> | <input type="radio"/> | <input type="radio"/> |
| 41 | gut drauf        | <input type="radio"/> | <input type="radio"/> | <input type="radio"/> | <input type="radio"/> | <input type="radio"/> |
| 42 | hungrig          | <input type="radio"/> | <input type="radio"/> | <input type="radio"/> | <input type="radio"/> | <input type="radio"/> |
| 43 | gesprächig       | <input type="radio"/> | <input type="radio"/> | <input type="radio"/> | <input type="radio"/> | <input type="radio"/> |
| 44 | glücklich        | <input type="radio"/> | <input type="radio"/> | <input type="radio"/> | <input type="radio"/> | <input type="radio"/> |
| 45 | schläfrig        | <input type="radio"/> | <input type="radio"/> | <input type="radio"/> | <input type="radio"/> | <input type="radio"/> |
| 46 | schmerzgeplagt   | <input type="radio"/> | <input type="radio"/> | <input type="radio"/> | <input type="radio"/> | <input type="radio"/> |

**MUVY-Pilotstudie**

|\_|\_|\_|

**32. Bestrahlungsprotokoll  
UV-Ganzkörperbestrahlungen zur Stimulation  
der Vitamin D<sub>3</sub>-Synthese****32.1 Hauttyp I**

Bestrahlungen mit GH-8 ST (8 x Arimed-B (100W), No. ....  
Abstand = 39 cm,  $E_{er} = 0,37 \text{ W m}^{-2}$ , 1 MED =  $250 \text{ J m}^{-2}$  (DIN 5050/1),  $T_{er} = 11,26 \text{ min}$

**Ablauf:**

- 3 UV-Bestrahlungen pro Woche, jeweils Bauchseite und Rückenseite.
- 1 Tag Pause zwischen zwei Bestrahlungen.
- Ausschlusskriterien aktuell überprüfen.
- keine Bestrahlung bei bestehendem UV-Erythem oder bereits erhaltener UV-Bestrahlung am gleichen Tag!
- Kosmetika einige Stunden vor der Bestrahlung entfernen!
- Schutzbrille aufsetzen!
- Dosis am Bestrahlungsgerät einstellen, Sollbestrahlungszeit wird angezeigt.
- Sollbestrahlungszeit ebenfalls am Kurzzeitwecker zur Kontrolle einstellen.

| Tag | Aktion | Datum | Erythemwirk-same Dosis |                      | Expos.-dauer [min : s] | Bestrahlung Blutabnahme (BA) |          |
|-----|--------|-------|------------------------|----------------------|------------------------|------------------------------|----------|
|     |        |       | [MED]                  | [J m <sup>-2</sup> ] |                        | Datum/Zeit                   | Aufsicht |
| 1   | 1 Blut |       | -                      | -                    | -                      |                              |          |
| 2   | 2 UV   |       | 0.32                   | 80,0                 | 3 : 36                 |                              |          |
| 3   | Pause  |       | -                      | -                    | -                      |                              |          |
| 4   | 3 UV   |       | 0.48                   | 120,0                | 5 : 24                 |                              |          |
| 5   | Pause  |       | -                      | -                    | -                      |                              |          |
| 6   | 4 UV   |       | 0.60                   | 150,0                | 6 : 45                 |                              |          |
| 7   | Pause  |       | -                      | -                    | -                      |                              |          |
| 8   | Pause  |       | -                      | -                    | -                      |                              |          |
| 9   | 5 Blut |       | -                      | -                    | -                      |                              |          |

**MUVY-Pilotstudie**

|\_|\_|\_|

**32. Bestrahlungsprotokoll  
UV-Ganzkörperbestrahlungen zur Stimulation  
der Vitamin D<sub>3</sub>-Synthese****32.2 Hauttyp II/III**

Bestrahlungen mit GH-8 ST (8 x Arimed-B (100W), No.: .....  
Abstand = 39 cm, E<sub>er</sub> = 0,37 W m<sup>-2</sup>, 1 MED = 250 J m<sup>-2</sup> (DIN 5050/1), T<sub>er</sub> = 11,26 min

**Ablauf:**

- 3 UV-Bestrahlungen pro Woche, jeweils Bauchseite und Rückenseite.
- 1 Tag Pause zwischen zwei Bestrahlungen.
- Ausschlusskriterien aktuell überprüfen.
- keine Bestrahlung bei bestehendem UV-Erythem oder bereits erhaltener UV-Bestrahlung am gleichen Tag!
- Kosmetika einige Stunden vor der Bestrahlung entfernen!
- Schutzbrille aufsetzen!
- Dosis am Bestrahlungsgerät einstellen, Sollbestrahlungszeit wird angezeigt.
- Sollbestrahlungszeit ebenfalls am Kurzzeitwecker zur Kontrolle einstellen.

| Tag | Aktion | Soll-Datum | Erythemwirk-same Dosis |                      | Expos.-dauer [min : s] | Bestrahlung Blutabnahme (BA) |          |
|-----|--------|------------|------------------------|----------------------|------------------------|------------------------------|----------|
|     |        |            | [MED]                  | [J m <sup>-2</sup> ] |                        | Datum/Zeit                   | Aufsicht |
| 1   | 1 Blut |            | -                      | -                    | -                      |                              |          |
| 2   | 2 UV   |            | 0.40                   | 100                  | 4 : 30                 |                              |          |
| 3   | Pause  |            | -                      | -                    | -                      |                              |          |
| 4   | 3 UV   |            | 0.60                   | 150,0                | 6 : 45                 |                              |          |
| 5   | Pause  |            | -                      | -                    | -                      |                              |          |
| 6   | 4 UV   |            | 0.75                   | 187,5                | 8 : 27                 |                              |          |
| 7   | Pause  |            | -                      | -                    | -                      |                              |          |
| 8   | Pause  |            | -                      | -                    | -                      |                              |          |
| 9   | 5 Blut |            | -                      | -                    | -                      |                              |          |



**33. Vitamin-D-Spiegel**

| Tag | Aktion                                      | Datum | 25-Hydroxy-Vitamin D<br>(in nmol/l) | 1,25-Dihydroxy-Vitamin D<br>(in pmol/l) |
|-----|---------------------------------------------|-------|-------------------------------------|-----------------------------------------|
| 1   | Blutabnahme vor erster Bestrahlung          |       |                                     |                                         |
| 8   | Blutabnahme 3 Tage nach letzter Bestrahlung |       |                                     |                                         |
| 36  | Blutabnahme nach 4 Wochen                   |       |                                     |                                         |
| 50  | Blutabnahme nach 6 Wochen                   |       |                                     |                                         |



**34. Unerwünschte Ereignisse/Nebenwirkungen**

Sind bei Ihnen folgende unerwünschte Ereignisse oder Nebenwirkungen aufgetreten?

Nein

Wenn ja, bitte markieren Sie welche und deren Schweregrad.

| Unerwünschtes Ereignis | Grad 1                                                                                  | Grad 2                                                                                                                                               | Grad 3                                                                                                                                                                          | Grad 4                                                                                                                                         | Grad 5 |
|------------------------|-----------------------------------------------------------------------------------------|------------------------------------------------------------------------------------------------------------------------------------------------------|---------------------------------------------------------------------------------------------------------------------------------------------------------------------------------|------------------------------------------------------------------------------------------------------------------------------------------------|--------|
| Schwindel              | Leichte Unsicherheit oder Bewegungsempfinden                                            | Mäßige Unsicherheit oder Bewegungsempfinden, Alltagstätigkeiten im sozialen und häuslichen Umfeld beschränkt                                         | Schwere Unsicherheit oder Bewegungsempfinden, Alltagstätigkeiten zur Selbstversorgung beschränkt                                                                                | -                                                                                                                                              | -      |
| Trockene Haut          | Betrifft <10% der Körperoberfläche und kein Erythem oder Pruritus                       | Betrifft 10 - 30% Körperoberfläche und Erythem oder Pruritus vorhanden; Alltagstätigkeiten im sozialen und häuslichen Umfeld beschränkt              | Betrifft >30% der Körperoberfläche und Pruritus vorhanden; Alltagstätigkeiten zur Selbstversorgung beschränkt                                                                   | -                                                                                                                                              | -      |
| Erythem                | -                                                                                       | Erythem (>90% Körperoberfläche) Keine assoziierten Symptome; Alltagstätigkeiten im sozialen und häuslichen Umfeld beschränkt                         | Erythem (>90% Körperoberfläche) mit assoziierten Symptomen (z.B. Pruritus oder Empfindlichkeit); Alltagstätigkeiten zur Selbstversorgung beschränkt                             | Erythem (>90% Körperoberfläche) mit assoziierter Flüssigkeit- oder Elektrolytabweichung; Intensivstation oder Zentrum für Schwerbrandverletzte | -      |
| Hautschmerzen          | Leichte Schmerzen                                                                       | Mäßige Schmerzen; Alltagstätigkeiten im sozialen und häuslichen Umfeld beschränkt                                                                    | Schwere Schmerzen; Alltagstätigkeiten zur Selbstversorgung beschränkt                                                                                                           | -                                                                                                                                              | -      |
| Photosensibilität      | schmerzloses Erythem (<10% Körperoberfläche)                                            | Empfindliches Erythem (10 - 30% Körperoberfläche)                                                                                                    | Erythem (>30% Körperoberfläche) mit Blasenbildung; Photosensibilität; orale Glucocorticoidtherapie indiziert; Schmerzlinderung indiziert (Schmerzmittel)                        | Lebensbedrohliche Konsequenzen; intensive Therapie indiziert                                                                                   | Tod    |
| Pruritus               | Leicht oder lokal begrenzt; lokale Therapie indiziert                                   | Intensiv oder generalisiert; intermittierend; Kratzspuren; orale Therapie indiziert; Alltagstätigkeiten im sozialen und häuslichen Umfeld beschränkt | Intensiv oder generalisiert; dauernd vorhanden; Alltagstätigkeiten zur Selbstversorgung oder Schlaf beschränkt; orale Glucocorticoid- oder immunosuppressive Therapie indiziert | -                                                                                                                                              | -      |
| Hautatrophie           | <10% Körperoberfläche; Assoziiert mit Teleangiectasien oder Veränderungen der Hautfarbe | 10 - 30% Körperoberfläche; Assoziiert mit Dehnungsstreifen oder Verlust der Hautanhangsgebilde                                                       | >30% Körperoberfläche; Assoziiert mit Ulzera                                                                                                                                    | -                                                                                                                                              | -      |
| Urtikaria              | <10% Körperoberfläche; lokale Therapie indiziert                                        | 10 - 30% Körperoberfläche; orale Therapie indiziert                                                                                                  | >30% Körperoberfläche; intravenöse Behandlung erforderlich                                                                                                                      | -                                                                                                                                              | -      |



**MUVY-Pilotstudie**

□□□□

|          |                                                            |                                                                                                                    |                                                                                               |   |   |
|----------|------------------------------------------------------------|--------------------------------------------------------------------------------------------------------------------|-----------------------------------------------------------------------------------------------|---|---|
| Übelkeit | Appetitlosigkeit,<br>keine Änderung der<br>Essgewohnheiten | Reduzierte<br>Nahrungsaufnahme, kein<br>signifikanter<br>Gewichtsverlust,<br>Dehydratation oder<br>Mangelernährung | Unzureichende Nahrungs-<br>oder<br>Flüssigkeitsaufnahme;<br>künstliche Ernährung<br>indiziert | - | - |
|----------|------------------------------------------------------------|--------------------------------------------------------------------------------------------------------------------|-----------------------------------------------------------------------------------------------|---|---|

Sind bei Ihnen unerwünschte Ereignisse oder Nebenwirkungen aufgetreten, die Sie nicht in dieser Tabelle gefunden haben? Wenn ja, welche und wie stark ausgeprägt?

| Unerwünschtes Ereignis | Grad 1<br>(gering/leicht) | Grad 2<br>(mäßig/deutlich) | Grad 3<br>(stark/ausgeprägt) | Grad 4<br>(lebensbedrohlich) |
|------------------------|---------------------------|----------------------------|------------------------------|------------------------------|
|                        |                           |                            |                              |                              |
|                        |                           |                            |                              |                              |
|                        |                           |                            |                              |                              |

Wann sind die unerwünschten Ereignisse aufgetreten und wann sind die verschwunden? Haben Sie irgendwelche Maßnahmen (z.B. Salbe bei Hautrötung) gegen die unerwünschten Ereignisse unternommen?

| Unerwünschtes Ereignis | Wann aufgetreten<br>(Datum) | Wann verschwunden<br>(Datum) | Maßnahmen |
|------------------------|-----------------------------|------------------------------|-----------|
|                        |                             |                              |           |
|                        |                             |                              |           |
|                        |                             |                              |           |
|                        |                             |                              |           |
|                        |                             |                              |           |
